# Supplementary material
Source: PubMed Central journal article supplement (PMC7171951)
Supplement: DC191162SupplementaryData.pdf [file DC191162SupplementaryData.pdf]

## SUPPLEMENTARY DATA

### Classification of antibiotics

*Narrow-spectrum antibiotics:* beta-lactamase sensitive penicillin (J01CE), beta-lactamase resistant penicillin (J01CF), trimethoprim and derivatives (J01EA), short-acting sulfonamides (J01EB), macrolides (J01FA), glycopeptides (J01XA), steroid antibacterials (fusidic acid) (J01XC), nitrofurantoin derivatives (nitrofurantoin) (J01XE) and metronidazole (J01XD01 or P01AB01), clindamycin (J01FF).

*Broad-spectrum antibiotics:* tetracyclines (J01AA), penicillin with extended spectrum (J01CA), combinations of penicillin incl. beta-lactamase inhibitors (J01CR) and fluoroquinolones (J01M), cephalosporins and related substances (J01DB, J01DC and J01DD), carbapenems (J01DH), combinations of sulfonamides and trimethoprim, incl. derivatives (J01EE), linezolid (J01XX08), methenamine (J01XX05) and chloramphenicol (J01BA).

*Prenatal life, groups according to the 4:th level of ATC:* penicillin with extended spectrum (J01CA), beta-lactamase sensitive penicillin (J01CE), beta-lactamase resistant penicillin (J01CF), first-generation cephalosporins (J01DB), nitrofurantoin derivatives (nitrofurantoin) (J01XE). Less than 1% of the mothers had dispensed antibiotics from other groups.

*First year of life, groups according to the 4:th level of ATC:* penicillin with extended spectrum (J01CA), beta-lactamase sensitive penicillin (J01CE), beta-lactamase resistant penicillin (J01CF), penicillin incl. beta-lactamase inhibitors (J01CR), first-generation cephalosporins (J01DB), trimethoprim and derivatives (J01EA), combinations of sulfonamides and trimethoprim, incl. derivatives (J01EE), macrolides (J01FA). Less than 1% of the children had dispensed antibiotics from other groups.

### Potential confounders

We collected information on the following potential confounding variables from the MBR: parity, maternal body mass index and smoking at first visit to the antenatal care clinic, mode of delivery, maternal age at delivery, child's sex, gestational age, small or large for gestational age and birth year and month. If maternal BMI was missing, but recorded for an earlier pregnancy, it was imputed using last observation "carry forward" (n=12 619 (1.8%)). We retrieved the following variables from the Longitudinal Integration Database for Health Insurance and Labor Market Studies: residence at the year of birth (municipality), parental level of education and disposable income (based on household income and adjusted for the number of adults and children, and their consumption weight). If education level was only known in one parent, the education level in the other parent was imputed to that level. We categorized disposable income into fifths, using quintiles for each year as cut-offs. Statistics Sweden provided population density (inhabitants per km<sup>2</sup>) for each municipality.

Parents were defined as having type 1 diabetes if they, before the child's first birthday, had 1) type 1 diabetes diagnosis (ICD-10: E10, O240) in the NPR and a prescription of insulin before end of follow-up 2) diabetes diagnosis before the age of 30 (ICD-9: 250, ICD-8:250, ICD-7:260) in the NPR and a prescription of insulin before end of follow-up, or 3) at least two prescriptions of insulin (ATC: A10A) according to the Swedish Prescribed Drug Register, not due to gestational diabetes, before the age of 30. Mothers were classed as having gestational diabetes if they had a gestational diabetes diagnosis (ICD-10:O244) in the NPR or the MBR.

SUPPLEMENTARY DATA

**Supplementary Table 1. Swedish national registers used in the study and the personal identity number.<sup>1</sup>**

| <b>Register</b>                                                                                                                                                                                                                                                                                                                                                                                                                                                                                              | <b>Description</b>                                                                                                                                                                                                                                                                                                                                                                     |
|--------------------------------------------------------------------------------------------------------------------------------------------------------------------------------------------------------------------------------------------------------------------------------------------------------------------------------------------------------------------------------------------------------------------------------------------------------------------------------------------------------------|----------------------------------------------------------------------------------------------------------------------------------------------------------------------------------------------------------------------------------------------------------------------------------------------------------------------------------------------------------------------------------------|
| <b>The Swedish Register of the Total Population (TPR)</b>                                                                                                                                                                                                                                                                                                                                                                                                                                                    | Held by the government agency of Statistics Sweden and updates are transmitted daily from the Tax Agency to the TPR. It contains the personal identity number for all Swedish residents and information on for example country of birth, date of death and migration.                                                                                                                  |
| <b>The Multi-Generation register</b>                                                                                                                                                                                                                                                                                                                                                                                                                                                                         | A special register based on the TPR. It contains data on all residents born after 1932 and any relationship to biological and adoptive parents                                                                                                                                                                                                                                         |
| <b>The Migration register</b>                                                                                                                                                                                                                                                                                                                                                                                                                                                                                | A special register based on the TPR which contains dates of immigration and migration.                                                                                                                                                                                                                                                                                                 |
| <b>The Longitudinal Integration Database for Health Insurance and Labour Market Studies</b>                                                                                                                                                                                                                                                                                                                                                                                                                  | Held by the government agency of Statistics Sweden and integrates existing data from the labour market, educational and social sectors registers. It is updated annually and includes an extensive set of socio-economic factors for all Swedish residents 16 years of age.                                                                                                            |
| <b>The Medical Birth Register</b>                                                                                                                                                                                                                                                                                                                                                                                                                                                                            | Held by the Swedish National Board of Health and Welfare. It is compulsory for every health care provider in Sweden to report to the register and it includes data on practically all deliveries in Sweden. Only 0.5-3.0 per cent of the deliveries are not reported to the register. The information is collected from medical records from the prenatal, delivery and neonatal care. |
| <b>Swedish Prescribed Drug Register</b>                                                                                                                                                                                                                                                                                                                                                                                                                                                                      | Held by the Swedish National Board of Health and Welfare. It contains information on all dispensed prescribed drugs at pharmacies in Sweden since July 2005 using the Anatomical Therapeutic Chemical (ATC) classification system.                                                                                                                                                     |
| <b>National Patient Register</b>                                                                                                                                                                                                                                                                                                                                                                                                                                                                             | Held by the Swedish National Board of Health and Welfare. It contains information on all inpatient diagnoses since 1987 and specialist outpatient diagnoses since 2001.                                                                                                                                                                                                                |
| <b>The personal identity number (PIN)</b> is a unique identifier and consist of a six-digit birth date and a four-digit identification number. The PIN is used in all public administration in Sweden and enables unambiguous linkage between the Swedish registers. At birth, the midwife or the hospital are obliged to report the birth to the National Tax Board and the child will be given a PIN. It is estimated that <0.1 % of newborns are not reported to the Population Registers within 30 days. |                                                                                                                                                                                                                                                                                                                                                                                        |

<sup>1</sup>Ludvigsson JF, Almqvist C, Bonamy AK, et al. Registers of the Swedish total population and their use in medical research. *Eur J Epidemiol.* 2016;31(2):125-136.

SUPPLEMENTARY DATA

**Supplementary Figure 1. Directed acyclic graph for antibiotic exposure in early childhood and type 1 diabetes**

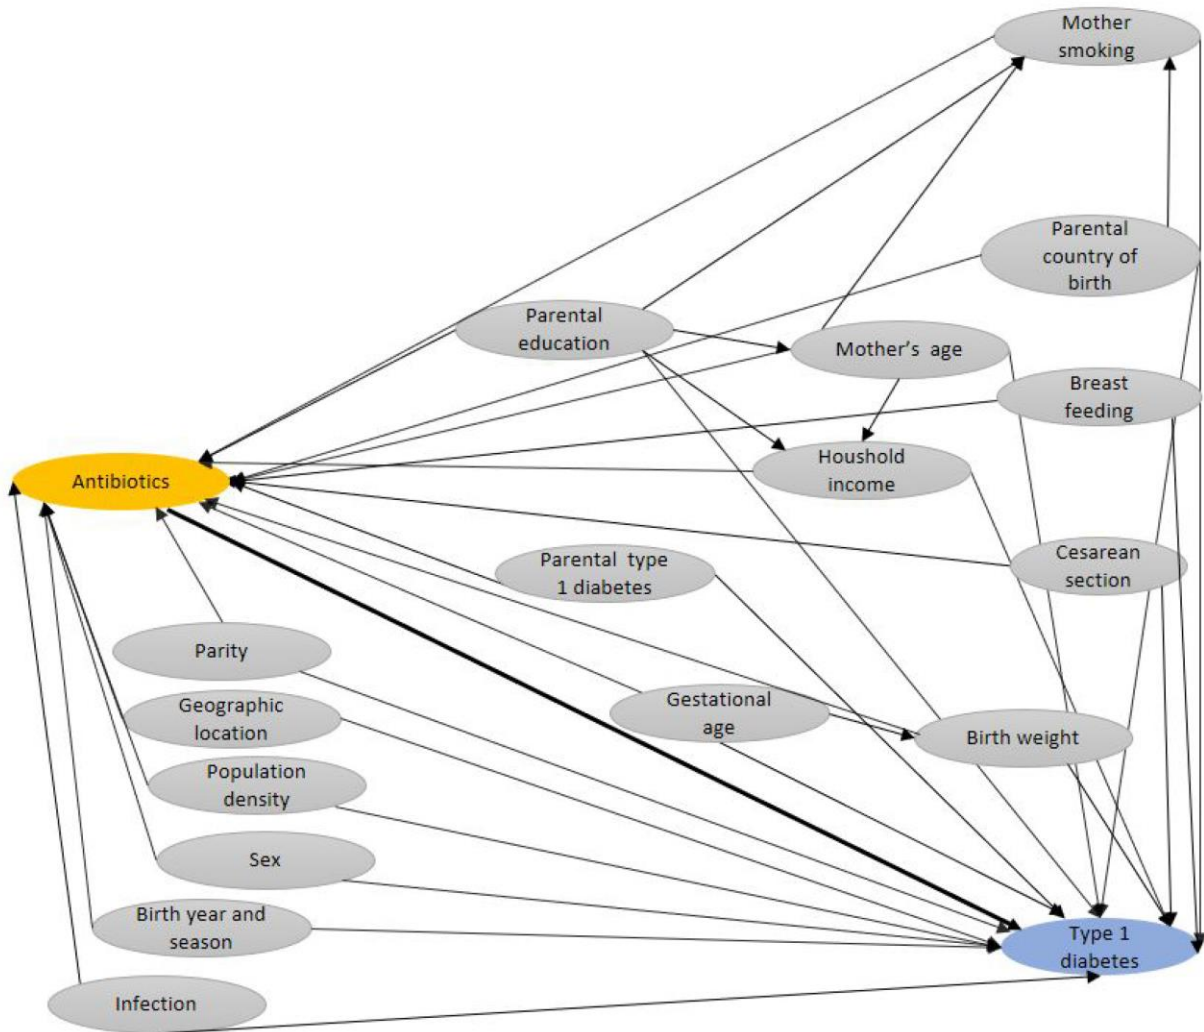

Directed acyclic graph for antibiotic exposure in early childhood (orange) and the outcome type 1 diabetes (blue), and the other variables shown in this graph are identified as confounders (grey) using the d-separation criteria. The arrows represent causal effects.

SUPPLEMENTARY DATA

**Supplementary Table 2. Reported indication in a random sample of 800 antibiotic prescriptions dispensed in the first year of life.**

| Site                       | Any antibiotic<br>n = 800 |         | Penicillin V (J01CE)<br>n = 408 |         | Otitis media and other<br>respiratory tract<br>antibiotics<br>n = 689 |         | Urinary tract or skin and<br>soft tissue antibiotics<br>n = 111 |         |
|----------------------------|---------------------------|---------|---------------------------------|---------|-----------------------------------------------------------------------|---------|-----------------------------------------------------------------|---------|
|                            | n                         | Percent | n                               | Percent | n                                                                     | Percent | n                                                               | Percent |
| <b>Ear</b>                 | 259                       | 69.6    | 186                             | 89.9    | 257                                                                   | 79.6    | 2                                                               | 4.0     |
| <b>Urinary tract</b>       | 43                        | 11.6    | 0                               | 0.0     | 14                                                                    | 4.3     | 29                                                              | 58.0    |
| <b>Lower airways</b>       | 8                         | 2.2     | 4                               | 1.9     | 8                                                                     | 2.5     | 0                                                               | 0.0     |
| <b>Upper airways</b>       | 20                        | 5.4     | 15                              | 7.2     | 20                                                                    | 6.2     | 0                                                               | 0.0     |
| <b>Unspecified airways</b> | 8                         | 2.2     | 1                               | 0.5     | 8                                                                     | 2.5     | 0                                                               | 0.0     |
| <b>Skin</b>                | 33                        | 8.9     | 1                               | 0.5     | 14                                                                    | 4.3     | 19                                                              | 38.0    |
| <b>Gastrointestinal</b>    | 2                         | 0.5     | 0                               | 0.0     | 2                                                                     | 0.6     | 0                                                               | 0.0     |
| <b>No information</b>      | 428                       |         | 201                             |         | 366                                                                   |         | 62                                                              |         |

\*Percent among the 372 prescriptions with information. Note that one of the prescriptions had 2 indications reported.

† Percent among the 207 prescriptions with information

SUPPLEMENTARY DATA

**Supplemental Table 3. Distribution of the variable “dosage form” for the prescribed antibiotics during prenatal life and first year of life. Only dosage forms that was used for >0.01% of the prescriptions are shown**

| <b>Dosage form</b>                      | <b>Prenatal life (mothers)<br/>Percent</b> | <b>First year of life<br/>Percent</b> |
|-----------------------------------------|--------------------------------------------|---------------------------------------|
| Granules for oral suspension            |                                            | 66.5                                  |
| Powder for oral suspension              |                                            | 18.7                                  |
| Granules for oral drops, solution       | <0.1                                       | 4.9                                   |
| Oral suspension                         |                                            | 4.4                                   |
| Oral solution                           |                                            | 2.8                                   |
| Tablet                                  | 23.5                                       | 1.7                                   |
| Granules for oral solution              | 0.1                                        | 0.4                                   |
| Granules for oral suspension in sachet  |                                            | 0.2                                   |
| Granules and liquid for oral suspension |                                            | 0.2                                   |
| Film-coated tablet                      | 66.8                                       | 0.1                                   |
| Soluble tablet                          | 0.1                                        | <0.1                                  |
| Powder for oral suspension, sachet      | <0.1                                       | <0.1                                  |
| Unspecified                             |                                            | <0.1                                  |
| Capsule, hard                           | 7.3                                        |                                       |
| Powder for solution for infusion        | <0.1                                       |                                       |
| Entero-capsule                          | 1.6                                        |                                       |
| Dispersible tablet                      | 0.3                                        |                                       |

SUPPLEMENTARY DATA

**Supplemental Table 4. Child and family characteristics, for children born in Sweden between July 1, 2005 and September 30, 2013 by antibiotic exposure.**

|                                           | Antibiotic exposure |                    |                     |                     |
|-------------------------------------------|---------------------|--------------------|---------------------|---------------------|
|                                           | Prenatal life*      |                    | First year of life† |                     |
|                                           | No                  | Yes                | No                  | Yes                 |
| <b>No of children</b>                     | 566 141             | 164 098            | 607 636             | 189 682             |
| <b>Smoking during pregnancy‡, No (%)</b>  |                     |                    |                     |                     |
| Non-smoker                                | 511 849 (90.4)      | 143 927 (87.7)     | 545 680 (89.8)      | 167 250 (88.2)      |
| 1 - 9 cigarettes/day                      | 24 982 (4.4)        | 10 072 (6.1)       | 28 250 (4.6)        | 10 460 (5.5)        |
| > 9 cigarettes/day                        | 6878 (1.2)          | 3273 (2.0)         | 8105 (1.3)          | 3283 (1.7)          |
| Missing                                   | 22 432 (4.0)        | 6826 (4.2)         | 25 601 (4.2)        | 8689 (4.6)          |
| <b>Gestational diabetes, No (%)</b>       | 6139 (1.1)          | 2318 (1.4)         | 6509 (1.1)          | 2455 (1.3)          |
| <b>Region of residence, No (%)</b>        |                     |                    |                     |                     |
| Götaland                                  | 270 327 (47.7)      | 76 291 (46.5)      | 284 601 (46.8)      | 93 464 (49.3)       |
| Svealand                                  | 232 064 (41.0)      | 71 334 (43.5)      | 251 649 (41.4)      | 79 920 (42.1)       |
| S Norrland                                | 34 973 (6.2)        | 9215 (5.6)         | 38 925 (6.4)        | 9509 (5.0)          |
| N Norrland                                | 28 618 (5.1)        | 7209 (4.4)         | 32 449 (5.3)        | 6783 (3.6)          |
| <b>Population density§, median (IQR)</b>  | 90.8 (35.7:1016.7)  | 98.1 (39.4:1094.9) | 89.8 (34.9: 963.2)  | 101.1 (43.2:1086.6) |
| Missing, No (%)                           | 159 (<0.1)          | 49 (<0.1)          | 12 (<0.1)           | 6 (<0.1)            |
| <b>Birth year, No (%)</b>                 |                     |                    |                     |                     |
| 2005 - 2008                               | 196 542 (34.7)      | 61 801 (37.7)      | 237 670 (39.1)      | 88 734 (46.8)       |
| 2009 - 2012                               | 369 599 (65.3)      | 102 297 (62.3)     | 369 966 (60.9)      | 100 948 (53.2)      |
| <b>Birth season, No (%)</b>               |                     |                    |                     |                     |
| Mars - May                                | 151 197 (26.7)      | 45 981 (28.0)      | 153 643 (25.3)      | 53 340 (28.1)       |
| June - Aug                                | 159 559 (28.2)      | 47 538 (29.0)      | 167 631 (27.6)      | 55 097 (29.0)       |
| Sept - Nov                                | 130 631 (23.1)      | 36 288 (22.1)      | 146 772 (24.2)      | 40 840 (21.5)       |
| Dec - Feb                                 | 124 754 (22.0)      | 34 291 (20.9)      | 139 590 (23.0)      | 40 405 (21.3)       |
| <b>Mother's highest education, No (%)</b> |                     |                    |                     |                     |
| Compulsory school                         | 54 667 (9.7)        | 21 136 (12.9)      | 59 105 (9.7)        | 23 777 (12.5)       |
| Upper secondary school                    | 216 057 (38.2)      | 65 754 (40.1)      | 233 612 (38.4)      | 77 321 (40.8)       |
| University                                | 294 436 (52.0)      | 76 914 (46.9)      | 314 069 (51.7)      | 88 251 (46.5)       |
| Missing                                   | 981 (0.2)           | 294 (0.2)          | 850 (0.1)           | 333 (0.2)           |
| <b>Father's highest education, No (%)</b> |                     |                    |                     |                     |
| Compulsory school                         | 64 093 (11.3)       | 22 399 (13.6)      | 68 326 (11.2)       | 25 992 (13.7)       |
| Upper secondary school                    | 268 456 (47.4)      | 79 233 (48.3)      | 289 821 (47.7)      | 91 900 (48.4)       |

SUPPLEMENTARY DATA

|                                        | Antibiotic exposure        |               |                                 |               |
|----------------------------------------|----------------------------|---------------|---------------------------------|---------------|
|                                        | Prenatal life <sup>*</sup> |               | First year of life <sup>†</sup> |               |
|                                        | No                         | Yes           | No                              | Yes           |
| University                             | 232 611 (41.1)             | 62 172 (37.9) | 248 639 (40.9)                  | 71 457 (37.7) |
| Missing                                | 981 (0.2)                  | 294 (0.2)     | 850 (0.1)                       | 333 (0.2)     |
| <b>Household income fifths, No (%)</b> |                            |               |                                 |               |
| 1 (Lowest)                             | 94 396 (16.7)              | 31 413 (19.1) | 99 655 (16.4)                   | 37 307 (19.7) |
| 2                                      | 114 439 (20.2)             | 35 059 (21.4) | 121 575 (20.0)                  | 41 568 (21.9) |
| 3                                      | 118 067 (20.9)             | 33 888 (20.7) | 126 272 (20.8)                  | 39 802 (21.0) |
| 4                                      | 119 767 (21.2)             | 32 177 (19.6) | 129 536 (21.3)                  | 36 513 (19.2) |
| 5 (Highest)                            | 119 426 (21.1)             | 31 544 (19.2) | 130 550 (21.5)                  | 34 469 (18.2) |
| Missing                                | 46 (<0.1)                  | 17 (<0.1)     | 48 (<0.1)                       | 23 (<0.1)     |

Abbreviations: IQR, interquartile range.

<sup>\*</sup>Children from pregnancies with an estimated start date on or after July 1, 2005. At least one antibiotic prescription during estimated duration of pregnancy.

<sup>†</sup>At least one dispensed antibiotic prescription in the child's first year of life.

<sup>‡</sup>At the first visit at the antenatal clinic.

<sup>§</sup>Inhabitants/km<sup>2</sup>

SUPPLEMENTARY DATA

**Supplementary Table 5. Subgroup analysis of the association between exposure to antibiotics in early life and childhood-onset type 1 diabetes.**

| Subgroup                            | Prenatal life* |          |                       |                  | First year of life† |          |                       |                  |
|-------------------------------------|----------------|----------|-----------------------|------------------|---------------------|----------|-----------------------|------------------|
|                                     | Total N        | Events N | Adjusted HR (95% CI)  | P <sub>int</sub> | Total N             | Events N | Adjusted HR (95% CI)  | P <sub>int</sub> |
| <b>Vaginal delivery</b>             | 571 829        | 856      | 1.10<br>(0.94 - 1.28) | 0.37             | 634 863             | 997      | 1.10<br>(0.96 - 1.28) | 0.016            |
| <b>Cesarean section</b>             | 113 173        | 216      | 1.27<br>(0.95 - 1.71) |                  | 126 044             | 241      | 1.60<br>(1.22 - 2.08) |                  |
| <b>Boy</b>                          | 352 128        | 555      | 1.13<br>(0.93 - 1.37) | 0.90             | 391 068             | 631      | 1.24<br>(1.04 - 1.47) | 0.54             |
| <b>Girl</b>                         | 332 874        | 517      | 1.15<br>(0.94 - 1.40) |                  | 369 839             | 607      | 1.14<br>(0.95 - 1.38) |                  |
| <b>No parental type 1 diabetes‡</b> | 675 003        | 943      | 1.11<br>(0.95 - 1.28) | 0.29             | 749 936             | 1092     | 1.20<br>(1.05 - 1.38) | 0.56             |
| <b>Parental type 1 diabetes§</b>    | 9999           | 129      | 1.37<br>(0.95 - 1.98) |                  | 10 971              | 146      | 1.07<br>(0.74 - 1.55) |                  |
| <b>Birth year &lt; 2009</b>         | 237 762        | 625      | 1.00<br>(0.83-1.20)   | 0.031            | 306 753             | 823      | 1.19<br>(1.02 - 1.38) | 0.91             |
| <b>Birth year ≥ 2009</b>            | 447 240        | 447      | 1.35<br>(1.10 - 1.66) |                  | 454 154             | 415      | 1.21<br>(0.97 - 1.51) |                  |

Abbreviations: HR hazard ratio; CI confidence interval; Pint p-value for interaction

\*Children from pregnancies with an estimated start date on or after July 1, 2005. At least one dispensed antibiotic prescription during estimated duration of pregnancy.

†At least one dispensed antibiotic prescription in the child’s first year of life.

‡Neither of the parents had type 1 diabetes.

§At least 1 of the parents had type 1 diabetes



SUPPLEMENTARY DATA

**Supplementary Table 6. The fifteen most common complications of labor and delivery in cesarean deliveries**

| <i>ICD 10</i> |                                                                                                          | <i>n</i> | <i>Percent</i> |
|---------------|----------------------------------------------------------------------------------------------------------|----------|----------------|
| O34           | Maternal care for known or suspected abnormality of pelvic organs                                        | 30 192   | 22.7           |
| O62           | Abnormalities of forces of labor                                                                         | 24 938   | 18.7           |
| O68           | Labor and delivery complicated by fetal stress [distress]                                                | 23 290   | 17.5           |
| O99           | Other maternal diseases classifiable elsewhere but complicating pregnancy, childbirth and the puerperium | 22 110   | 16.6           |
| O32           | Maternal care for known or suspected malpresentation of fetus                                            | 20 828   | 15.7           |
| O61           | Failed induction of labor                                                                                | 19 752   | 14.8           |
| O67           | Labor and delivery complicated by intrapartum haemorrhage, not elsewhere classified                      | 12 959   | 9.7            |
| O60           | Preterm delivery                                                                                         | 12 634   | 9.5            |
| O36           | Maternal care for other known or suspected fetal problems                                                | 11 612   | 8.7            |
| O75           | Other complications of labor and delivery, not elsewhere classified                                      | 10 199   | 7.7            |
| O26           | Maternal care for other conditions predominantly related to pregnancy                                    | 9408     | 7.1            |
| O14           | Gestational [pregnancy-induced] hypertension with significant proteinuria                                | 8736     | 6.6            |
| O48           | Prolonged pregnancy                                                                                      | 8691     | 6.5            |
| O64           | Obstructed labor due to malposition and malpresentation of fetus                                         | 8101     | 6.1            |
| O41           | Other disorders of amniotic fluid and membranes                                                          | 4779     | 3.6            |

SUPPLEMENTARY DATA

**Supplementary Table 7. The association between exposure to specific antibiotics and childhood-onset type 1 diabetes.**

| Exposure                                             | Events/Total |               | Adjusted Hazard Ratio (95% CI) |
|------------------------------------------------------|--------------|---------------|--------------------------------|
|                                                      | Yes          | No            |                                |
| <b>Prenatal life*</b>                                |              |               |                                |
| Penicillin with extended spectrum (J01CA)            | 80/ 49 347   | 992/ 635 655  | 1.08 (0.86 - 1.36)             |
| Penicillin V (J01CE)                                 | 127/ 70 954  | 945/ 614 048  | 1.10 (0.91 - 1.33)             |
| First generation cephalosporins (J01DB)              | 21/ 13 909   | 1051/ 671 093 | 0.74 (0.47 - 1.15)             |
| Nitrofurantoin derivatives (nitrofurantoin) (J01XE)  | 68/ 33 259   | 1004/ 651 743 | 1.23 (0.95 - 1.60)             |
| <b>First year of life<sup>†</sup></b>                |              |               |                                |
| Penicillin with extended spectrum (J01CA)            | 69/37 621    | 1169/723 286  | 0.98 (0.76 - 1.26)             |
| Penicillin V (J01CE)                                 | 258/130 143  | 980/630 764   | 1.23 (1.06 - 1.42)             |
| B-lactam resistant (J01CF)                           | 24/11 534    | 1214/749 373  | 1.31 (0.87 - 1.97)             |
| Combination of penicillins (J01CR)                   | 35/15 108    | 1203/745 799  | 0.99 (0.70 - 1.40)             |
| First generation cephalosporins (J01DB)              | 23/11 334    | 1215/749 573  | 1.12 (0.74 - 1.70)             |
| Combination of sulfonamides and trimethoprim (J01EE) | 21/8751      | 1217/752 156  | 1.23 (0.80 - 1.90)             |
| Macrolides (J01FA)                                   | 21/10 082    | 1217/750 825  | 0.99 (0.64 - 1.54)             |

\*At least one dispensed antibiotic prescription during estimated duration of pregnancy.

<sup>†</sup>At least one dispensed antibiotic prescription in the child's first year of life.

SUPPLEMENTARY DATA

**Supplementary Figure 2. The association between exposure to antibiotics in the first 6 month of life and childhood-onset type 1 diabetes**

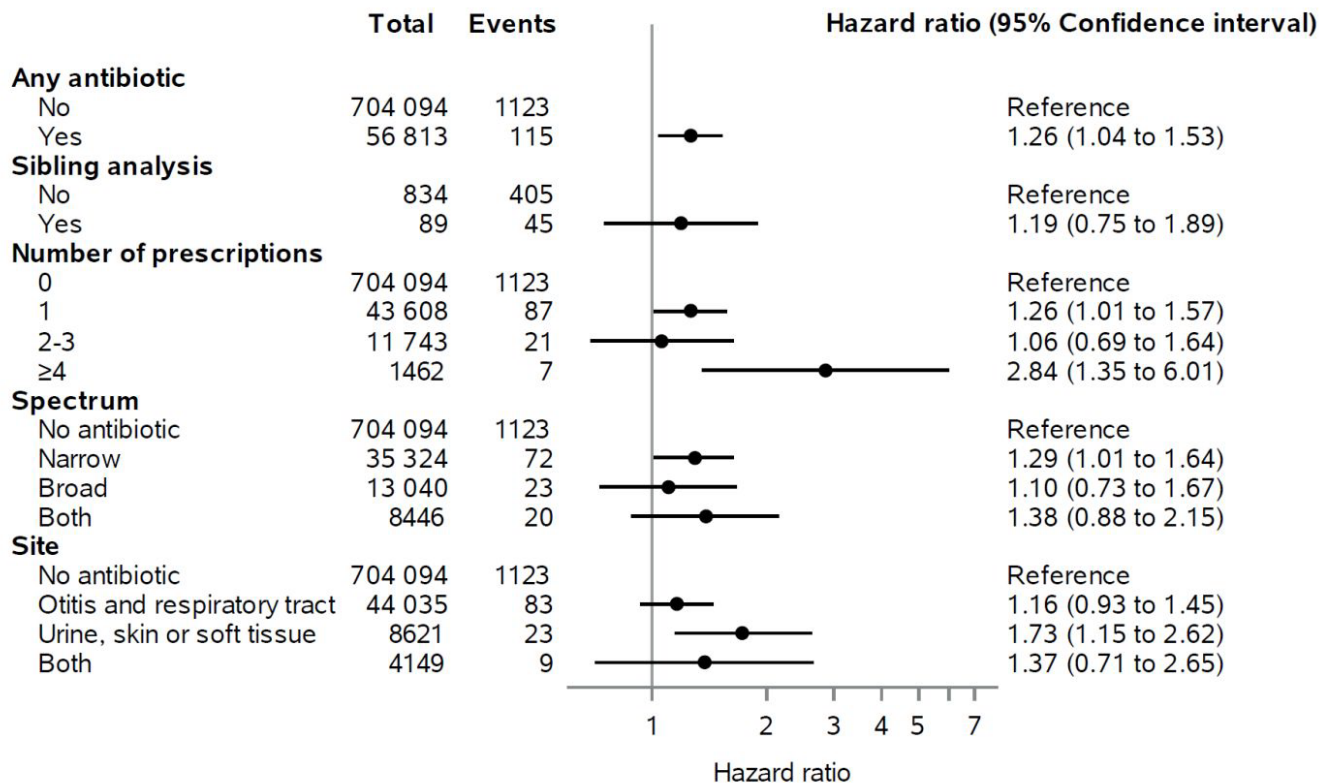

Only families with at least 1 type 1 diabetes event and at least 1 type 1 diabetes-free individual at the age of event in the type 1 diabetes case are included in the sibling analysis
